# Supplementary material for: Environmentally-friendly preparation of natural hollow carbon spheres derived from a biomass puffball for in situ upgrading of lignin-derived vanillin
Source: Royal Society of Chemistry journal article supplement (doi:10.1039/d3gc04067d), 2023-12-13
Supplement: d3gc04067d1.pdf [file d3gc04067d1.pdf]

# Environmentally-friendly preparation of natural hollow carbon sphere derived from biomass puffball for in-situ upgrading of lignin-derived vanillin

Changzhou Chen <sup>a\*</sup>, Xialin Ji <sup>a</sup>, Yongzhi Xiong <sup>a</sup>, Jianchun Jiang <sup>a,b\*</sup>

<sup>a</sup> Fujian Provincial Key Laboratory of Biomass Low-Carbon Conversion, Academy of Advanced Carbon Conversion Technology, Huaqiao University, Xiamen 361021, China

<sup>b</sup> Institute of Chemical Industry of Forest Products, Chinese Academy of Forestry, Nanjing 210042, China

\*Corresponding authors. E-mail address: chenchangzhou@hqu.edu.cn (C. Chen), jiangjc@icifp.cn (J. Jiang)

**Catalyst characterization:** N<sub>2</sub> adsorption-desorption isotherms of Ni<sub>x</sub>Cu<sub>y</sub>/BC catalysts were carried out at -196 °C using a Micromeritics ASAP 2460 apparatus to obtain the parameter of surface area, pore volume and pore size distribution. Powder X-ray diffraction (XRD) patterns of Ni<sub>x</sub>Cu<sub>y</sub>/BC catalysts were carried out on a Rigaku Smart Lab SE using Ni filtered Cu K $\alpha$  radiation ( $\lambda = 1.5406 \text{ \AA}$ ) with a scan speed of 10° min<sup>-1</sup> and a scan range of 30-80° at 30 kV and 15 mA. Raman spectroscopy was carried out to study the degree of graphitization by a WITec alpha300R using a laser excitation wavelength of 532 nm. Scanning electron microscopy (SEM) was investigating by employing a ZEISS Gemini SEM 300. high-resolution transmission electron microscopy (HRTEM) images of the Ni<sub>x</sub>Cu<sub>y</sub>/BC catalysts were studied by a FEI Talos F200S. X-ray photoelectron spectroscopy (XPS) was performed to study the element states of the Ni and Cu by employing a Thermo Scientific K-Alpha with Al-K $\alpha$  as the photon source. H<sub>2</sub>-temperature programmed reduction (H<sub>2</sub>-TPR) and NH<sub>3</sub>-temperature programmed desorption (NH<sub>3</sub>-TPD) were studied on a Micromeritics

Auto Chem II 2920.

The density functional theory (DFT) was calculated by the first principle and Perdew Burke ernzerhof (PBE) formula. The plane-wave basis set was used to expand the smooth part of the wave functions with a cutoff kinetic energy of 450 eV. The sufficiently large vacuum region of 18 Å was employed to make sure the periodic images were separated. The convergence criterion of the electronic self-consistent loop was  $10^{-5}$  eV and the atomic structures were optimized until the residual forces were below  $0.03 \text{ eV \AA}^{-1}$ .

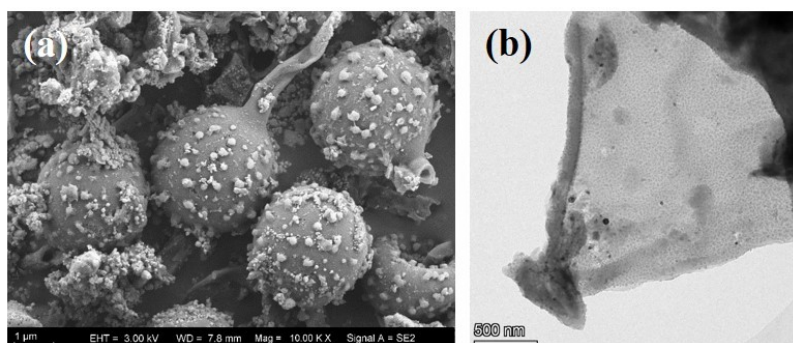

Fig. S1 (a-b) SEM and HRTEM images of puffball-based biochar.

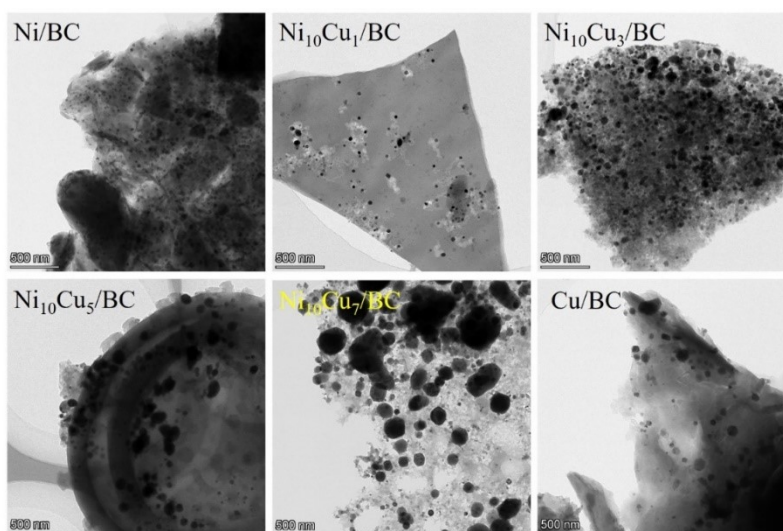

Fig. S2 HRTEM images of all Ni<sub>x</sub>Cu<sub>y</sub>/BC catalyst.

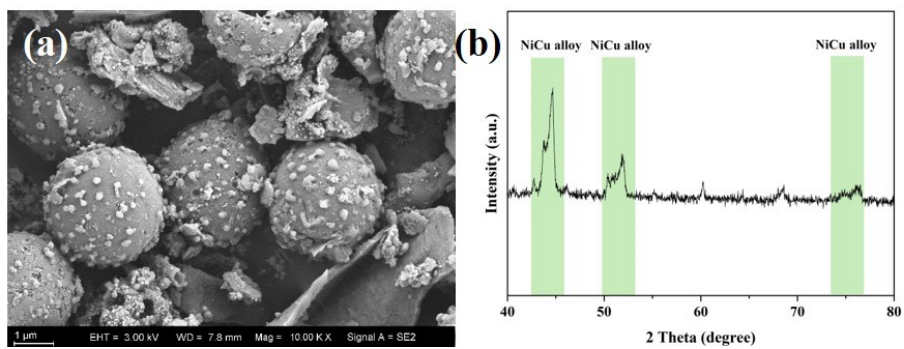

Fig. S3 (a-b) SEM images and XRD patterns of spent  $\text{Ni}_{10}\text{Cu}_5/\text{BC}$  catalyst.

Table S1 Conversion of VAN over different none-noble catalysts.

| Catalysts                                | Solvents                 | Reaction conditions  |        |       | Conv.<br>(%) | Sel.<br>(%) | Ref.             |
|------------------------------------------|--------------------------|----------------------|--------|-------|--------------|-------------|------------------|
|                                          |                          | H <sub>2</sub> (MPa) | T (°C) | t (h) |              |             |                  |
| Ni <sub>2</sub> P/HY                     | ethanol                  | 2                    | 220    | 5     | 99           | 100         | [1]              |
| HD-Ni/N-CMS                              | H <sub>2</sub> O         | 2                    | 150    | 10    | 100          | 99          | [2]              |
| Cu-PMO                                   | Methanol                 | 4                    | 180    | 18    | 100          | 90          | [3]              |
| Ni/SiO <sub>2</sub> -ZrO <sub>2</sub>    | octane                   | 5                    | 300    | 16    | 100          | 54          | [4]              |
| Ni-MFC-700                               | methanol                 | 2                    | 200    | 10    | 100          | 96.5        | [5]              |
| Co@NP-700                                | H <sub>2</sub> O         | 0.5                  | 180    | 4     | 95.7         | 100         | [6]              |
| Ni/ZrP                                   | isopropanol              | 2                    | 220    | 0.5   | 97.25        | 88.39       | [7]              |
| CoNi/Al <sub>2</sub> O <sub>3</sub>      | isopropanol              | 1                    | 200    | 1     | 100          | 99.2        | [8]              |
| Ni/ZrP                                   | isopropanol              | 0.5                  | 180    | 1     | 100          | 87.8        | [9]              |
| Cu-Ni/CeO <sub>2</sub> -SiO <sub>2</sub> | H <sub>2</sub> O         | 2.5                  | 150    | 12    | 96           | 90.6        | [10]             |
| Ni/biochar                               | ethanol                  | 3                    | 170    | 2     | 79.3         | 80.4        | [11]             |
| Ni/T-Nb <sub>2</sub> O <sub>5</sub>      | H <sub>2</sub> O/ethanol | 1                    | 180    | 1     | 96.1         | 79.2        | [12]             |
| Cu-Ni/CZ-B                               | H <sub>2</sub> O         | 2.5                  | 160    | 12    | 96.0         | 90.2        | [13]             |
| Ni <sub>10</sub> Cu <sub>5</sub> /BC     | isopropanol              | /                    | 240    | 4     | ~100         | 88.12       | <i>This work</i> |

Table S2 Metal content of Ni<sub>10</sub>Cu<sub>5</sub>/BC before and after VAN hydrodeoxygenation.

| Catalysts                                  | Metal content <sup>a</sup> (wt%) |      |
|--------------------------------------------|----------------------------------|------|
|                                            | Ni                               | Cu   |
| Fresh Ni <sub>10</sub> Cu <sub>5</sub> /BC | 9.8                              | 5.12 |
| Spent Ni <sub>10</sub> Cu <sub>5</sub> /BC | 8.2                              | 4.31 |

<sup>a</sup> Determined by ICP-OES.

Table S3 Control experiment with VAL as raw material.

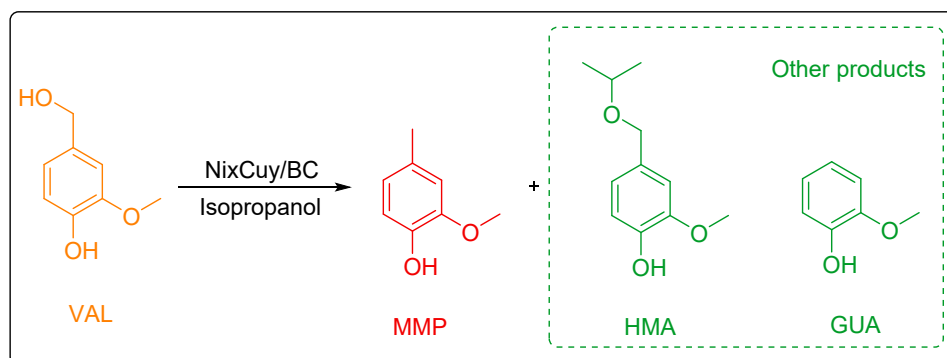

| Substrate | Conversion | HMA   | MMP    | GUA   |
|-----------|------------|-------|--------|-------|
| VAL       | ~100%      | 3.15% | 89.60% | 7.25% |

Reaction condition: 20mg Ni<sub>10</sub>Cu<sub>5</sub>/BC catalyst, 2.0 MPa N<sub>2</sub>, 4 h, 240 °C, isopropanol.

- [1] Y. Geng, M. Lang, G. Li, W. Yin, Z. Yang and H. Li, *Catal. Lett.*, 2022, **153**, 911-920.
- [2] R. Fan, Z. Hu, C. Chen, X. Zhu, H. Zhang, Y. Zhang, H. Zhao and G. Wang, *Chem. Commun.*, 2020, **56**, 6696-6699.
- [3] L. Petitjean, R. Gagne, E. Beach, D. Xiao and P. Anastas, *Green. Chem.*, 2016, **18**, 150-156.
- [4] X. Zhang, W. Tang, Q. Zhang, T. Wang and L. Ma, *Energy Procedia.*, 2017, **105**, 518-523.
- [5] X. Tong, P. Guo, S. Liao, S. Xue and H. Zhang, *Green. Chem.*, 2019, **21**, 5828-5840.
- [6] H. Yang, R. Nie, W. Xia, X. Yu, D. Jin, X. Lu, D. Zhou and Q. Xia, *Green. Chem.*, 2017, **19**, 5714-5722.
- [7] J. Gao, Y. Cao, G. Luo, J. Fan, J.H. Clark and S. Zhang, *Chem. Eng. J.*, 2022, **448**, 137723.
- [8] M. Liu, J. Zhang, L. Zheng, G. Fan, L. Yang and F. Li, *ACS Sustainable Chem. Eng.*, 2020, **8**, 6075-6089.
- [9] J. Gao, Y. Cao, G. Luo, J. Fan, J. Clark and S. Zhang, *Chem. Eng. J.*, 2022, **448**, 137723.
- [10] D. Mukherjee, R. Singuru, P. Venkataswamy, D. Damma and B.M. Reddy, *ACS Omega*, 2019, **4**, 4770-4778.
- [11] Y. Wang, Y. Shao, L. Zhang, S. Zhang, Y. Wang, J. Xiang, S. Hu, G. Hu and X. Hu, *Fuel*, 2021, **293**, 120426.
- [12] Z. Zhang, H. Xu and H. Li, *Fuel*, 2022, **324**, 124400.
- [13] R. Singuru, J. Lee, K. Dhanalaxmi, B.M. Reddy, K. An and J. Mondal, *ChemistrySelect*, 2018, **3**, 6174-6185.
